# Supplementary material for: Effects of Climate Extremes on Spring Phenology of Temperate Vegetation in China
Source: MDPI journal article supplement (doi:10.3390/rs15030686), 2023-01-24
Supplement: s1 [file s1]

# Effects of climate extremes on spring phenology of temperate vegetation in China

**Yunhua Mo** <sup>1,†</sup>, Xuan Zhang <sup>1,†</sup>, Zunchi Liu <sup>1</sup>, Jing Zhang <sup>1</sup>, Fanghua Hao <sup>2</sup> and Yongshuo Fu <sup>1,3\*</sup>

1 College of Water Sciences, Beijing Normal University, Beijing 100875, China

2 College of Urban and Environmental Sciences, Central China Normal University, Wuhan 430079, China

3. Plants and Ecosystems, Department of Biology, University of Antwerp, Antwerp, Belgium

## Contents of this file

Tables S1 to S7

**Table S1.** Summary of six curve fitting methods in determining start of the growing season (SOS) from satellite-derived NDVI data.

| Method | curve fitting function                                                                                                                                                                               |
|--------|------------------------------------------------------------------------------------------------------------------------------------------------------------------------------------------------------|
| AG     | $\text{NDVI}(t) = \begin{cases} g_1 + g_2 e^{-\left(\frac{t-n_1}{n_2}\right)^{n_3}} & \text{if } t > n_1 \\ g_1 + g_2 e^{-\left(\frac{n_1-t}{n_4}\right)^{n_5}} & \text{if } t \leq n_1 \end{cases}$ |
| Beck   | $\text{NDVI}(t) = m_1 + m_2 \left( \frac{1}{1 + e^{m_3 - m_4 t}} - \frac{1}{1 + e^{m_5 - m_6 t}} \right)$                                                                                            |
| Elmore | $\text{NDVI}(t) = m_1 + (m_2 - m_7 t) \left( \frac{1}{1 + e^{(m'_3 - t)/m'_4}} - \frac{1}{1 + e^{(m'_5 - t)/m'_6}} \right)$                                                                          |
| Gu     | $\text{NDVI}(t) = k_1 + \frac{k_2}{(1 + e^{l_1 - l_2 t})^{u_1}} - \frac{k_3}{(1 + e^{l_3 - l_4 t})^{u_2}}$                                                                                           |
| Klos   | $\text{NDVI}(t) = (a_1 t + b_1) + (a_2 t^2 + b_2 t + c) \left( \frac{1}{(1 + q_1 e^{d_1 - d_2 t})^{v_1}} - \frac{1}{(1 + q_2 e^{d_3 - d_4 t})^{v_2}} \right)$                                        |
| Zhang  | $\text{NDVI}(t) = \frac{c_3}{1 + e^{c_1 + c_2 t}} + c_4$                                                                                                                                             |

In the curve filter function, t is the Julian date, NDVI(t) is the fitted NDVI value by the equation of each filter function and the others are parameters to be fitted.

**Table S2.** Temporal trends of the start of the growing season (SOS) for the three vegetation types: mixed forest (MF), grasslands (GL), and barren or sparsely vegetated land (BOSV). The percentages represent the percentage of pixels with advanced or delayed SOS (percentage of pixels with p value < 0.05 in parentheses).

| Vegetation types | 1982-1998   |            | 1998-2015   |             | 1982-2015   |             |
|------------------|-------------|------------|-------------|-------------|-------------|-------------|
|                  | Advance (%) | Delay (%)  | Advance (%) | Delay (%)   | Advance (%) | Delay (%)   |
| <b>MF</b>        | 86.6 (21.9) | 13.4 (0.4) | 55.5 (8.4)  | 44.5 (2.7)  | 87.2 (53.1) | 12.8 (1.8)  |
| <b>GL</b>        | 59.9 (10.6) | 40.1 (5.0) | 45.2 (5.5)  | 54.8 (8.8)  | 60.0 (17.7) | 40.0 (10.0) |
| <b>BOSV</b>      | 53.0 (5.3)  | 47.0 (3.8) | 30.3 (3.7)  | 69.7 (13.2) | 52.8 (12.8) | 47.2 (12.2) |

**Table S3.** Changes in climate extremes indices over the period 1982-2015. Negative means that the climate extremes indices decrease with the year (percentage of pixels with P < 0.05 in parentheses), while positive means that it increases with the year. The values in the table are the percentage of the trend.

|                               | MF           |              | GL           |              | BOSV         |              | ALL          |              |
|-------------------------------|--------------|--------------|--------------|--------------|--------------|--------------|--------------|--------------|
|                               | Negative (%) | Positive (%) |
| Extreme temperature indices   |              |              |              |              |              |              |              |              |
| FD                            | 91.7 (60.5)  | 8.3 (0.0)    | 82.7 (24.2)  | 17.3 (1.8)   | 72.0 (22.4)  | 28.0 (1.9)   | 83.4 (27.3)  | 16.6 (1.6)   |
| TN10P                         | 93.2 (3.9)   | 6.8 (0.0)    | 58.1 (10.0)  | 41.9 (1.3)   | 60.7 (33.6)  | 39.3 (0.0)   | 61.1 (9.7)   | 38.9 (1.2)   |
| TX10P                         | 60.7 (0.0)   | 39.3 (0.0)   | 40.0 (2.0)   | 60.0 (1.7)   | 35.5 (15.9)  | 64.5 (0.0)   | 41.7 (1.9)   | 58.3 (1.6)   |
| TN90P                         | 11.5 (0.1)   | 88.5 (0.3)   | 42.1 (1.7)   | 57.9 (4.4)   | 23.4 (0.0)   | 76.6 (15.9)  | 39.3 (1.5)   | 60.7 (4.1)   |
| TX90P                         | 40.5 (7.0)   | 59.5 (10.4)  | 56.6 (6.3)   | 43.4 (4.5)   | 43.9 (1.9)   | 56.1 (6.5)   | 55.1 (6.3)   | 44.9 (5.0)   |
| TXX                           | 41.9 (16.0)  | 58.1 (2.4)   | 60.0 (8.0)   | 40.0 (4.5)   | 51.4 (11.2)  | 48.6 (7.5)   | 58.4 (8.8)   | 41.6 (4.4)   |
| TNX                           | 52.0 (28.9)  | 48.0 (3.1)   | 50.5 (6.2)   | 49.5 (7.0)   | 42.1 (8.4)   | 57.9 (15.9)  | 50.6 (8.1)   | 49.4 (6.8)   |
| TXN                           | 39.0 (7.9)   | 61.0 (0.0)   | 91.9 (14.4)  | 8.1 (0.0)    | 96.3 (29.0)  | 3.7 (0.0)    | 87.4 (14.0)  | 12.6 (0.0)   |
| TNN                           | 28.9 (0.1)   | 71.1 (3.9)   | 79.4 (17.3)  | 20.6 (0.6)   | 62.6 (30.8)  | 37.4 (4.7)   | 75.0 (16.0)  | 25.0 (1.0)   |
| TMAXMEAN                      | 87.1 (10.0)  | 12.9 (0.1)   | 51.6 (6.7)   | 48.4 (8.3)   | 33.6 (12.1)  | 66.4 (26.2)  | 54.4 (7.0)   | 45.6 (7.8)   |
| TMINMEAN                      | 56.2 (11.2)  | 43.8 (0.1)   | 42.6 (4.0)   | 57.4 (14.5)  | 31.8 (11.2)  | 68.2 (34.6)  | 43.7 (4.6)   | 56.3 (13.4)  |
| CSDI                          | 60.4 (0.0)   | 39.6 (0.0)   | 43.6 (1.4)   | 56.4 (1.5)   | 41.1 (20.6)  | 58.9 (0.0)   | 45.0 (1.5)   | 55.0 (1.4)   |
| SU                            | 44.4 (19.4)  | 55.6 (6.9)   | 26.7 (1.6)   | 73.3 (3.5)   | 29.9 (0.9)   | 70.1 (1.9)   | 28.2 (3.1)   | 71.8 (3.8)   |
| ID                            | 47.7 (0.0)   | 52.3 (0.0)   | 56.2 (9.1)   | 43.8 (0.2)   | 68.2 (33.6)  | 31.8 (2.8)   | 55.6 (8.5)   | 44.4 (0.2)   |
| TR                            | 50.3 (26.0)  | 49.7 (2.1)   | 34.2 (4.6)   | 65.8 (5.7)   | 39.3 (2.8)   | 60.7 (3.7)   | 35.6 (6.4)   | 64.4 (5.4)   |
| Extreme precipitation indices |              |              |              |              |              |              |              |              |
| RX1DAY                        | 70.2 (8.3)   | 29.8 (0.1)   | 54.4 (5.3)   | 45.6 (2.6)   | 47.7 (1.9)   | 52.3 (2.8)   | 55.7 (5.5)   | 44.3 (2.4)   |
| RX5DAY                        | 70.4 (3.1)   | 29.6 (0.1)   | 56.5 (4.6)   | 43.5 (2.5)   | 53.3 (1.9)   | 46.7 (2.8)   | 57.6 (4.5)   | 42.4 (2.3)   |
| R95P                          | 74.1 (16.3)  | 25.9 (0.0)   | 51.4 (5.2)   | 48.6 (5.3)   | 48.6 (1.9)   | 51.4 (4.7)   | 53.3 (6.1)   | 46.7 (4.8)   |
| R99P                          | 41.3 (1.8)   | 58.7 (4.6)   | 56.9 (7.2)   | 43.1 (2.6)   | 47.7 (2.8)   | 52.3 (5.6)   | 55.5 (6.7)   | 44.5 (2.8)   |
| CDD                           | 16.6 (0.0)   | 83.4 (4.8)   | 52.6 (8.3)   | 47.4 (4.4)   | 60.7 (3.7)   | 39.3 (2.8)   | 49.6 (7.6)   | 50.4 (4.4)   |
| CWD                           | 79.9 (7.1)   | 20.1 (0.1)   | 41.6 (1.4)   | 58.4 (4.4)   | 55.1 (2.8)   | 44.9 (1.9)   | 45.0 (1.9)   | 55.0 (4.0)   |
| R10MM                         | 78.9 (31.0)  | 21.1 (0.3)   | 51.8 (5.4)   | 48.2 (4.6)   | 38.3 (0.9)   | 61.7 (3.7)   | 54.0 (7.5)   | 46.0 (4.2)   |
| R20MM                         | 56.6 (2.7)   | 43.4 (0.9)   | 52.2 (6.1)   | 47.8 (1.7)   | 29.9 (0.9)   | 70.1 (0.9)   | 52.4 (5.8)   | 47.6 (1.6)   |
| SDII                          | 51.2 (5.1)   | 48.8 (1.0)   | 46.9 (5.4)   | 53.1 (4.6)   | 49.5 (2.8)   | 50.5 (10.3)  | 47.3 (5.4)   | 52.7 (4.3)   |
| PRCPTOT                       | 79.2 (31.1)  | 20.8 (0.0)   | 56.2 (8.0)   | 43.8 (6.4)   | 53.3 (3.7)   | 46.7 (2.8)   | 58.1 (9.9)   | 41.9 (5.8)   |

**Table S4.** Changes in trends in climate extremes indices from 1982-1998 to 1998-2015. Negative means that the climate extremes indices decrease with the year (percentage of pixels with  $P < 0.05$  in parentheses), while positive means that it increases with the year. The values in the table are the difference in the percentage of the trend in the climate extremes indices between 1998-2015 and 1982-1998.

|                               | MF               |                  | GL               |                  | BOSV             |                | ALL              |                  |
|-------------------------------|------------------|------------------|------------------|------------------|------------------|----------------|------------------|------------------|
|                               | Negative (%)     | Positive (%)     | Negative (%)     | Positive (%)     | Negative (%)     | Positive (%)   | Negative (%)     | Positive (%)     |
| Extreme temperature indices   |                  |                  |                  |                  |                  |                |                  |                  |
| FD                            | -57.9<br>(-5.4)  | 57.9<br>(0.0)    | -66.9<br>(-18.8) | 66.9<br>(4.3)    | -57.0<br>(-15.9) | 57.0<br>(15.9) | -66.0<br>(-17.6) | 66.0<br>(4.0)    |
| TN10P                         | -79.7<br>(-15.4) | 79.7<br>(0.0)    | -60.1<br>(-1.1)  | 60.1<br>(1.3)    | -15.8<br>(0.0)   | 15.8<br>(0.0)  | -61.3<br>(-2.3)  | 61.3<br>(1.2)    |
| TX10P                         | -60.9<br>(-2.6)  | 60.9<br>(0.0)    | -42.0<br>(0.0)   | 42.0<br>(0.9)    | -14.9<br>(0.0)   | 14.9<br>(0.0)  | -43.4<br>(-0.2)  | 43.4<br>(0.8)    |
| TN90P                         | 12.2<br>(0.6)    | -12.2<br>(-0.1)  | 9.1<br>(1.5)     | -9.1<br>(-2.1)   | -16.8<br>(0.9)   | 16.8<br>(-2.8) | 9.1<br>(1.4)     | -9.1<br>(-1.9)   |
| TX90P                         | -15.0<br>(-0.6)  | 15.0<br>(0.8)    | 4.3<br>(0.1)     | -4.3<br>(2.4)    | 8.4<br>(0.9)     | -8.4<br>(11.2) | 2.7<br>(0.1)     | -2.7<br>(2.4)    |
| TXX                           | -32.7<br>(6.0)   | 32.7<br>(0.4)    | -9.8<br>(-4.7)   | 9.8<br>(3.1)     | -6.5<br>(1.9)    | 6.5<br>(12.1)  | -11.7<br>(-3.7)  | 11.7<br>(2.9)    |
| TNX                           | -15.7<br>(10.2)  | 15.7<br>(0.6)    | 3.7<br>(2.4)     | -3.7<br>(0.2)    | -6.5<br>(2.8)    | 6.5<br>(7.5)   | 2.0<br>(3.1)     | -2.0<br>(0.4)    |
| TXN                           | 34.6<br>(2.4)    | -34.6<br>(-6.8)  | 21.4<br>(0.5)    | -21.4<br>(-0.8)  | 4.6<br>(1.9)     | -4.6<br>(0.0)  | 22.3<br>(0.6)    | -22.3<br>(-1.3)  |
| TNN                           | 34.2<br>(-6.9)   | -34.2<br>(-3.9)  | 38.8<br>(7.9)    | -38.8<br>(-4.9)  | 21.4<br>(6.6)    | -21.4<br>(0.0) | 38.2<br>(6.7)    | -38.2<br>(-4.7)  |
| TMAXMEAN                      | 21.5<br>(-10.6)  | -21.5<br>(-4.6)  | 23.2<br>(4.6)    | -23.2<br>(-6.8)  | -12.2<br>(2.8)   | 12.2<br>(6.5)  | 22.7<br>(3.3)    | -22.7<br>(-6.5)  |
| TMINMEAN                      | 53.2<br>(7.6)    | -53.2<br>(-11.2) | 41.8<br>(7.5)    | -41.8<br>(-16.2) | -7.5<br>(2.8)    | 7.5<br>(5.6)   | 42.3<br>(7.5)    | -42.3<br>(-15.6) |
| CSDI                          | -50.9<br>(0.0)   | 50.9<br>(0.1)    | -39.0<br>(-0.4)  | 39.0<br>(0.9)    | -14.1<br>(0.0)   | 14.1<br>(-0.9) | -39.7<br>(-0.4)  | 39.7<br>(0.8)    |
| SU                            | -0.6<br>(8.9)    | 0.6<br>(0.8)     | 19.9<br>(1.5)    | -19.9<br>(-2.1)  | 14.0<br>(6.5)    | -14.0<br>(1.9) | 18.1<br>(2.2)    | -18.1<br>(-1.7)  |
| ID                            | -76.2<br>(-1.4)  | 76.2<br>(0.5)    | -43.1<br>(-2.0)  | 43.1<br>(3.5)    | -17.8<br>(-2.8)  | 17.8<br>(-0.9) | -45.7<br>(-2.0)  | 45.7<br>(3.2)    |
| TR                            | -39.2<br>(13.3)  | 39.2<br>(0.7)    | 15.3<br>(2.8)    | -15.3<br>(-1.0)  | 2.8<br>(6.5)     | -2.8<br>(-1.0) | 10.5<br>(3.7)    | -10.5<br>(-0.8)  |
| Extreme precipitation indices |                  |                  |                  |                  |                  |                |                  |                  |
| RX1DAY                        | -20.5<br>(-3.4)  | 20.5<br>(-0.2)   | -1.0<br>(-0.7)   | 1.0<br>(-0.7)    | -5.6<br>(2.8)    | 5.6<br>(-2.8)  | -2.7<br>(-0.9)   | 2.7<br>(-0.7)    |
| RX5DAY                        | -7.5<br>(-10.6)  | 7.5<br>(-2.2)    | 3.8<br>(0.7)     | -3.8<br>(-0.8)   | -20.6<br>(-0.9)  | 20.6<br>(2.8)  | 2.6<br>(-0.4)    | -2.6<br>(-0.9)   |
| R95P                          | 2.8<br>(-7.1)    | -2.8<br>(-1.5)   | 12.7<br>(1.8)    | -12.7<br>(-0.3)  | -2.8<br>(-0.9)   | 2.8<br>(0.9)   | 11.7<br>(1.1)    | -11.7<br>(-0.3)  |
| R99P                          | -29.7<br>(-5.7)  | 29.7<br>(0.6)    | 4.7<br>(-0.9)    | -4.7<br>(-0.8)   | -17.7<br>(-0.9)  | 17.7<br>(0.0)  | 1.6<br>(-1.4)    | -1.6<br>(-0.7)   |
| CDD                           | -20.4<br>(-0.3)  | 20.4<br>(0.0)    | -13.5<br>(-10.3) | 13.5<br>(-3.0)   | -10.3<br>(-6.5)  | 10.3<br>(0.9)  | -14.1<br>(-9.4)  | 14.1<br>(-2.7)   |
| CWD                           | 6.7<br>(-2.8)    | -6.7<br>(-1.2)   | 27.7<br>(1.3)    | -27.7<br>(-3.7)  | 10.3<br>(-0.9)   | -10.3<br>(1.9) | 25.8<br>(1.0)    | -25.8<br>(-3.4)  |
| R10MM                         | 14.6<br>(-7.7)   | -14.6<br>(0.0)   | 7.9<br>(2.5)     | -7.9<br>(-0.2)   | -5.7<br>(-0.9)   | 5.7<br>(1.0)   | 8.3<br>(1.6)     | -8.3<br>(-0.2)   |
| R20MM                         | -10.8<br>(-3.6)  | 10.8<br>(-1.4)   | 3.6<br>(-1.9)    | -3.6<br>(0.0)    | -4.7<br>(0.9)    | 4.7<br>(0.0)   | 2.3<br>(-2.1)    | -2.3<br>(-0.1)   |
| SDII                          | 13.3<br>(-6.7)   | -13.3<br>(0.2)   | -22.6<br>(-2.1)  | 22.6<br>(0.0)    | -33.6<br>(-1.0)  | 33.6<br>(-0.9) | -19.6<br>(-2.5)  | 19.6<br>(0.0)    |
| PRCPTOT                       | 28.2<br>(-11.3)  | -28.2<br>(-0.6)  | 14.5<br>(2.4)    | -14.5<br>(-0.7)  | -3.7<br>(-0.9)   | 3.7<br>(3.8)   | 15.5<br>(1.2)    | -15.5<br>(-0.7)  |

**Table S5.** Changes in extreme climate indices over the period 1982-1998. Negative means that the extreme climate indices decreases with the year (percentage of pixels with  $P < 0.05$  in parentheses), while positive means that it increases with the year. The values in the table are the percentage of the trend.

| ID                            | MF           |              | GL           |              | BOSV         |              | ALL          |              |
|-------------------------------|--------------|--------------|--------------|--------------|--------------|--------------|--------------|--------------|
|                               | Negative (%) | Positive (%) |
| Extreme temperature indices   |              |              |              |              |              |              |              |              |
| FD                            | 99.5 (6.1)   | 0.5 (0.0)    | 89.3 (19.8)  | 10.7 (0.1)   | 83.2 (16.8)  | 16.8 (0.0)   | 90.1 (18.6)  | 9.9 (0.1)    |
| TN10P                         | 98.6 (15.4)  | 1.4 (0.0)    | 81.3 (1.1)   | 18.7 (0.0)   | 55.1 (0.0)   | 44.9 (0.0)   | 82.5 (2.3)   | 17.5 (0.0)   |
| TX10P                         | 74.0 (2.6)   | 26.0 (0.0)   | 54.4 (0.0)   | 45.6 (0.0)   | 33.6 (0.0)   | 66.4 (0.0)   | 55.9 (0.2)   | 44.1 (0.0)   |
| TN90P                         | 9.5 (0.0)    | 90.5 (0.1)   | 37.7 (0.8)   | 62.3 (3.3)   | 34.6 (0.0)   | 65.4 (3.7)   | 35.3 (0.7)   | 64.7 (3.0)   |
| TX90P                         | 52.3 (1.7)   | 47.7 (1.0)   | 41.1 (1.8)   | 58.9 (1.4)   | 34.6 (0.0)   | 65.4 (8.4)   | 42.0 (1.7)   | 58.0 (1.4)   |
| TXX                           | 77.3 (12.7)  | 22.7 (0.1)   | 55.5 (6.7)   | 44.5 (0.7)   | 46.7 (0.9)   | 53.3 (4.7)   | 57.3 (7.1)   | 42.7 (0.7)   |
| TNX                           | 63.7 (3.1)   | 36.3 (3.1)   | 49.6 (2.6)   | 50.4 (3.0)   | 36.4 (0.0)   | 63.6 (5.6)   | 50.6 (2.6)   | 49.4 (3.0)   |
| TXN                           | 26.1 (0.0)   | 73.9 (6.8)   | 46.5 (0.4)   | 53.5 (0.8)   | 90.7 (0.0)   | 9.3 (0.0)    | 45.2 (0.4)   | 54.8 (1.3)   |
| TNN                           | 27.3 (6.9)   | 72.7 (3.9)   | 41.7 (0.1)   | 58.3 (5.0)   | 63.6 (0.9)   | 36.4 (0.0)   | 40.7 (0.7)   | 59.3 (4.8)   |
| TMAXMEAN                      | 52.2 (12.4)  | 47.8 (4.6)   | 40.9 (0.9)   | 59.1 (7.6)   | 45.8 (0.0)   | 54.2 (2.8)   | 41.9 (1.8)   | 58.1 (7.3)   |
| TMINMEAN                      | 22.2 (0.3)   | 77.8 (11.2)  | 24.0 (0.1)   | 76.0 (17.1)  | 41.1 (0.0)   | 58.9 (5.6)   | 24.0 (0.1)   | 76.0 (16.5)  |
| CSDI                          | 90.1 (0.0)   | 9.9 (0.0)    | 67.9 (0.5)   | 32.1 (0.1)   | 47.7 (0.0)   | 52.3 (0.9)   | 69.6 (0.5)   | 30.4 (0.1)   |
| SU                            | 49.5 (2.7)   | 50.5 (0.5)   | 14.7 (0.9)   | 85.3 (2.9)   | 11.2 (0.0)   | 88.8 (0.9)   | 17.6 (1.0)   | 82.4 (2.6)   |
| ID                            | 76.4 (1.4)   | 23.6 (0.1)   | 70.0 (2.5)   | 30.0 (0.0)   | 63.6 (2.8)   | 36.4 (0.9)   | 70.5 (2.4)   | 29.5 (0.0)   |
| TR                            | 85.1 (13.0)  | 14.9 (0.3)   | 21.2 (0.9)   | 78.8 (2.9)   | 25.2 (0.0)   | 74.8 (4.7)   | 26.7 (1.9)   | 73.3 (2.7)   |
| Extreme precipitation indices |              |              |              |              |              |              |              |              |
| RX1DAY                        | 71.3 (7.2)   | 28.7 (0.3)   | 57.7 (2.2)   | 42.3 (1.2)   | 58.9 (0.0)   | 41.1 (2.8)   | 58.9 (2.6)   | 41.1 (1.2)   |
| RX5DAY                        | 60.0 (11.0)  | 40.0 (2.5)   | 53.0 (1.0)   | 47.0 (1.5)   | 57.0 (0.9)   | 43.0 (0.0)   | 53.7 (1.9)   | 46.3 (1.6)   |
| R95P                          | 64.1 (10.9)  | 35.9 (1.8)   | 52.3 (0.8)   | 47.7 (1.2)   | 45.8 (0.9)   | 54.2 (1.9)   | 53.3 (1.6)   | 46.7 (1.2)   |
| R99P                          | 61.6 (6.5)   | 38.4 (0.3)   | 53.7 (2.6)   | 46.3 (1.6)   | 57.9 (0.9)   | 42.1 (0.9)   | 54.4 (3.0)   | 45.6 (1.5)   |
| CDD                           | 60.0 (0.6)   | 40.0 (0.2)   | 61.7 (10.6)  | 38.3 (6.0)   | 50.5 (6.5)   | 49.5 (0.0)   | 61.5 (9.7)   | 38.5 (5.5)   |
| CWD                           | 51.3 (3.9)   | 48.7 (1.4)   | 28.6 (1.3)   | 71.4 (7.2)   | 33.6 (2.8)   | 66.4 (0.0)   | 30.6 (1.5)   | 69.4 (6.6)   |
| R10MM                         | 58.4 (9.7)   | 41.6 (0.3)   | 52.8 (0.8)   | 47.2 (1.7)   | 42.1 (0.9)   | 57.9 (0.9)   | 53.2 (1.5)   | 46.8 (1.6)   |
| R20MM                         | 50.3 (6.2)   | 49.7 (2.5)   | 44.8 (3.0)   | 55.2 (0.7)   | 27.1 (0.0)   | 72.9 (0.0)   | 45.1 (3.3)   | 54.9 (0.8)   |
| SDII                          | 49.0 (8.6)   | 51.0 (1.9)   | 67.5 (3.0)   | 32.5 (1.4)   | 65.4 (1.9)   | 34.6 (3.7)   | 65.9 (3.5)   | 34.1 (1.5)   |
| PRCPTOT                       | 58.0 (13.0)  | 42.0 (0.6)   | 49.4 (0.7)   | 50.6 (2.0)   | 45.8 (0.9)   | 54.2 (0.9)   | 50.1 (1.8)   | 49.9 (1.9)   |

**Table S6.** Changes in extreme climate indices over the period 1998-2015. Negative means that the extreme climate indices decreases with the year (percentage of pixels with  $P < 0.05$  in parentheses), while positive means that it increases with the year. The values in the table are the percentage of the trend.

| ID                            | MF           |              | GL           |              | BOSV         |              | ALL          |              |
|-------------------------------|--------------|--------------|--------------|--------------|--------------|--------------|--------------|--------------|
|                               | Negative (%) | Positive (%) |
| Extreme temperature indices   |              |              |              |              |              |              |              |              |
| FD                            | 41.6 (0.7)   | 58.4 (0.0)   | 22.4 (1.0)   | 77.6 (4.4)   | 26.2 (0.9)   | 73.8 (15.9)  | 24.1 (1.0)   | 75.9 (4.1)   |
| TN10P                         | 18.9 (0.0)   | 81.1 (0.0)   | 21.2 (0.0)   | 78.8 (1.3)   | 39.3 (0.0)   | 60.7 (0.0)   | 21.2 (0.0)   | 78.8 (1.2)   |
| TX10P                         | 13.1 (0.0)   | 86.9 (0.0)   | 12.4 (0.0)   | 87.6 (0.9)   | 18.7 (0.0)   | 81.3 (0.0)   | 12.5 (0.0)   | 87.5 (0.8)   |
| TN90P                         | 21.7 (0.6)   | 78.3 (0.0)   | 46.8 (2.3)   | 53.2 (1.2)   | 17.8 (0.9)   | 82.2 (0.9)   | 44.4 (2.1)   | 55.6 (1.1)   |
| TX90P                         | 37.3 (1.1)   | 62.7 (1.8)   | 45.4 (1.9)   | 54.6 (3.8)   | 43.0 (0.9)   | 57.0 (19.6)  | 44.7 (1.8)   | 55.3 (3.8)   |
| TXX                           | 44.6 (18.7)  | 55.4 (0.5)   | 45.7 (2.0)   | 54.3 (3.8)   | 40.2 (2.8)   | 59.8 (16.8)  | 45.6 (3.4)   | 54.4 (3.6)   |
| TNX                           | 48.0 (13.3)  | 52.0 (3.7)   | 53.3 (5.0)   | 46.7 (3.2)   | 29.9 (2.8)   | 70.1 (13.1)  | 52.6 (5.7)   | 47.4 (3.4)   |
| TXN                           | 60.7 (2.4)   | 39.3 (0.0)   | 67.9 (0.9)   | 32.1 (0.0)   | 95.3 (1.9)   | 4.7 (0.0)    | 67.5 (1.0)   | 32.5 (0.0)   |
| TNN                           | 61.5 (0.0)   | 38.5 (0.0)   | 80.5 (8.0)   | 19.5 (0.1)   | 85.0 (7.5)   | 15.0 (0.0)   | 78.9 (7.4)   | 21.1 (0.1)   |
| TMAXMEAN                      | 73.7 (1.8)   | 26.3 (0.0)   | 64.1 (5.5)   | 35.9 (0.8)   | 33.6 (2.8)   | 66.4 (9.3)   | 64.6 (5.1)   | 35.4 (0.8)   |
| TMINMEAN                      | 75.4 (7.9)   | 24.6 (0.0)   | 65.8 (7.6)   | 34.2 (0.9)   | 33.6 (2.8)   | 66.4 (11.2)  | 66.3 (7.6)   | 33.7 (0.9)   |
| CSDI                          | 39.2 (0.0)   | 60.8 (0.1)   | 28.9 (0.1)   | 71.1 (1.0)   | 33.6 (0.0)   | 66.4 (0.0)   | 29.9 (0.1)   | 70.1 (0.9)   |
| SU                            | 48.9 (11.6)  | 51.1 (1.3)   | 34.6 (2.4)   | 65.4 (0.8)   | 25.2 (6.5)   | 74.8 (2.8)   | 35.7 (3.2)   | 64.3 (0.9)   |
| ID                            | 0.2 (0.0)    | 99.8 (0.6)   | 26.9 (0.5)   | 73.1 (3.5)   | 45.8 (0.0)   | 54.2 (0.0)   | 24.8 (0.4)   | 75.2 (3.2)   |
| TR                            | 45.9 (26.3)  | 54.1 (1.0)   | 36.5 (3.7)   | 63.5 (1.9)   | 28.0 (6.5)   | 72.0 (3.7)   | 37.2 (5.6)   | 62.8 (1.9)   |
| Extreme precipitation indices |              |              |              |              |              |              |              |              |
| RX1DAY                        | 50.8 (3.8)   | 49.2 (0.1)   | 56.7 (1.5)   | 43.3 (0.5)   | 53.3 (2.8)   | 46.7 (0.0)   | 56.2 (1.7)   | 43.8 (0.5)   |
| RX5DAY                        | 52.5 (0.4)   | 47.5 (0.3)   | 56.8 (1.7)   | 43.2 (0.7)   | 36.4 (0.0)   | 63.6 (2.8)   | 56.3 (1.5)   | 43.7 (0.7)   |
| R95P                          | 66.9 (3.8)   | 33.1 (0.3)   | 65.0 (2.6)   | 35.0 (0.9)   | 43.0 (0.0)   | 57.0 (2.8)   | 65.0 (2.7)   | 35.0 (0.9)   |
| R99P                          | 31.9 (0.8)   | 68.1 (0.9)   | 58.4 (1.7)   | 41.6 (0.8)   | 40.2 (0.0)   | 59.8 (0.9)   | 56.0 (1.6)   | 44.0 (0.8)   |
| CDD                           | 39.6 (0.3)   | 60.4 (0.2)   | 48.2 (0.3)   | 51.8 (3.0)   | 40.2 (0.0)   | 59.8 (0.9)   | 47.4 (0.3)   | 52.6 (2.8)   |
| CWD                           | 58.0 (1.1)   | 42.0 (0.2)   | 56.3 (2.6)   | 43.7 (3.5)   | 43.9 (1.9)   | 56.1 (1.9)   | 56.4 (2.5)   | 43.6 (3.2)   |
| R10MM                         | 73.0 (2.0)   | 27.0 (0.3)   | 60.7 (3.3)   | 39.3 (1.5)   | 36.4 (0.0)   | 63.6 (1.9)   | 61.5 (3.1)   | 38.5 (1.4)   |
| R20MM                         | 39.5 (2.6)   | 60.5 (1.1)   | 48.4 (1.1)   | 51.6 (0.7)   | 22.4 (0.9)   | 77.6 (0.0)   | 47.4 (1.2)   | 52.6 (0.7)   |
| SDII                          | 62.3 (1.9)   | 37.7 (2.1)   | 44.9 (0.9)   | 55.1 (1.4)   | 31.8 (0.9)   | 68.2 (2.8)   | 46.3 (1.0)   | 53.7 (1.5)   |
| PRCPTOT                       | 86.2 (1.7)   | 13.8 (0.0)   | 63.9 (3.1)   | 36.1 (1.3)   | 42.1 (0.0)   | 57.9 (4.7)   | 65.6 (3.0)   | 34.4 (1.2)   |

**Table S7.** Regression coefficients for the best regression model of climate extremes indices and the start of the growing season (SOS) for three vegetation types: mixed forest (MF), grasslands (GL), and barren or sparsely vegetated land (BOSV).

| Land cover | Variable  | Coefficient | Scaled coefficient | Significance |
|------------|-----------|-------------|--------------------|--------------|
| MF         | TMINMEAN  | 2.62        | 1.54               | *            |
|            | FD        | 0.62        | 1.28               | *            |
|            | ID        | 0.31        | 0.92               | *            |
|            | PRCPTOT   | 0.08        | 0.43               | *            |
|            | TNN       | -0.33       | -0.32              | *            |
|            | TR        | 0.63        | 0.31               | *            |
|            | SDII      | -1.78       | -0.18              | *            |
|            | R20MM     | -1.08       | -0.09              | *            |
|            | CDD       | 0.07        | 0.08               | *            |
|            | TNX       | 0.23        | 0.07               | *            |
|            | Intercept | 61.47       | 0                  |              |
| GL         | FD        | 0.82        | 1.31               | *            |
|            | TMINMEAN  | 2.19        | 0.59               | *            |
|            | TR        | 0.62        | 0.55               | *            |
|            | ID        | 0.21        | 0.3                | *            |
|            | TNX       | 0.6         | 0.27               | *            |
|            | TMAXMEAN  | 0.84        | 0.22               | *            |
|            | TNN       | -0.57       | -0.17              | *            |
|            | SU        | -0.31       | -0.14              | *            |
|            | TX90P     | 0.34        | 0.09               | *            |
|            | R95P      | 0.03        | 0.07               | *            |
|            | Intercept | 27.6        | 0                  |              |
| BOSV       | FD        | 0.87        | 1.04               | *            |
|            | TMINMEAN  | 3.64        | 0.71               | *            |
|            | TR        | 0.98        | 0.43               | *            |
|            | ID        | 0.24        | 0.28               | *            |
|            | TNN       | -0.77       | -0.17              | *            |
|            | SU        | -0.77       | -0.17              | *            |
|            | TN90P     | 0.87        | 0.11               | *            |
|            | Intercept | 37.25       | 0                  |              |
| All        | FD        | 0.79        | 1.25               | *            |
|            | TMINMEAN  | 2.91        | 0.78               | *            |
|            | TR        | 0.46        | 0.37               | *            |
|            | ID        | 0.19        | 0.27               | *            |
|            | TNX       | 0.55        | 0.22               | *            |
|            | TNN       | -0.52       | -0.18              | *            |
|            | TX90P     | 0.33        | 0.08               | *            |
|            | R95P      | 0.03        | 0.07               | *            |
|            | Intercept | 43.13       | 0                  |              |

\*P < 0.05.
